# Supplementary material for: How IGF-1 activates its receptor
Source: eLife journal article supplement (doi:10.7554/elife.03772), 2014-09-25
Supplement: supp [file elife_poa_e03772_Figure_8_supplemental_figure_1.pdf › elife_poa_e03772_Figure_8_supplemental_figure_1.pdf]

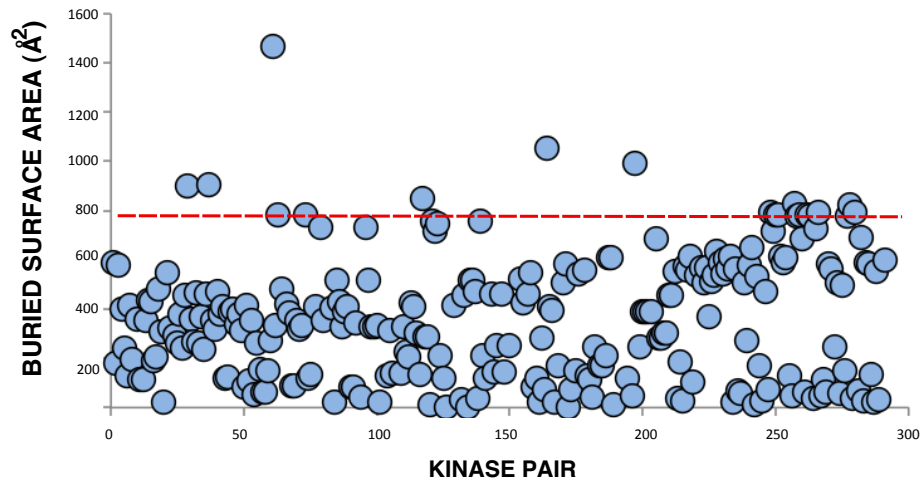

| KINASE PAIR | PDB CODE | REFERENCE                |
|-------------|----------|--------------------------|
| 1-9         | 1IRK     | Hubbard et al., 1994     |
| 10-17       | 1I44     | Till et al., 2001        |
| 18-24       | IK3A     | Faylveikuis et al., 2001 |
| 25-32       | 1IR3     | Hubbard et al., 1997     |
| 33-40       | 1GAG     | Parang et al., 2001      |
| 41-48       | 1P14     | Li et al., 2003          |
| 49-60       | 2OJ9     | Velparthy et al., 2007   |
| 61-78       | 1P4O     | Munshi et al., 2003      |
| 79-101      | 1M7N     | Munshi et al., 2002      |
| 102-108     | 2AUH     | Depetris et al., 2005    |
| 109-116     | 3BU3     | Wu et al., 2008          |
| 117-120     | 2B4S     | Li et al., 2005          |
| 121-141     | 1JQH     | Pautsch et al., 2001     |
| 142-152     | 1RQQ     | Huet et al., 2003        |
| 161-167     | 3D94     | Wuet et al., 2008        |
| 168-204     | 2ZM3     | Mayeret et al., 2008     |
| 205-211     | 3ETA     | Patnaiket al., 2009      |
| 212-291     | 3F5P     | Miller et al., 2009      |
