# Supplementary material for: How IGF-1 activates its receptor
Source: eLife journal article supplement (doi:10.7554/elife.03772), 2014-09-25
Supplement: supp [file elife_poa_e03772_Figure_8_supplemental_figure_2.pdf › elife_poa_e03772_Figure_8_supplemental_figure_2.pdf]

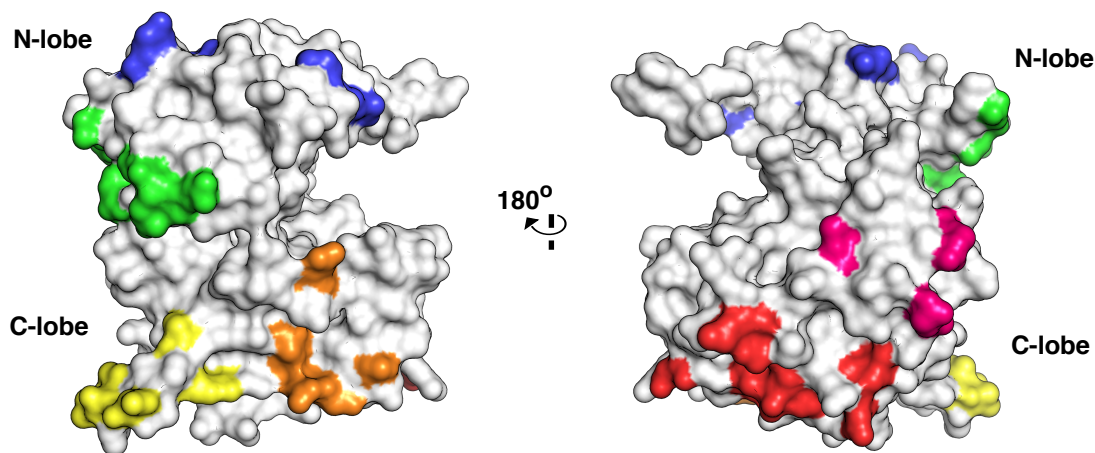

| C1     | C2     | C3    | C4     | C5     | C6     |
|--------|--------|-------|--------|--------|--------|
| E961A  | E1197A | S972A | S1063A | L1230A | E1132A |
| E963A  | L1200A | R973A | R1065A | E1238A | Q1181A |
| E967A  | D1202A | E974A | N1070A | R1245A | Q1184A |
| M1011A | D1209A | D994A | N1071A |        | S1185A |
| R1012A | M1210A | E995A | V1073A |        | E1187A |
| L1018A | F1212A | E997A | L1074A |        |        |
|        | R1216A | R999A |        |        |        |
|        | R1216A |       |        |        |        |
|        | Q1220A |       |        |        |        |
|        | M1225A |       |        |        |        |
