# Supplementary material for: How IGF-1 activates its receptor
Source: eLife journal article supplement (doi:10.7554/elife.03772), 2014-09-25

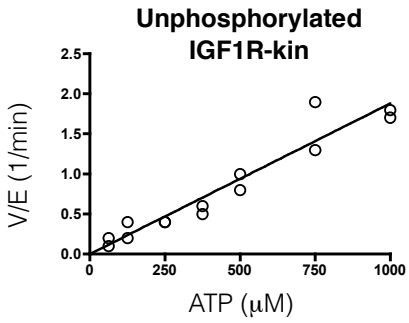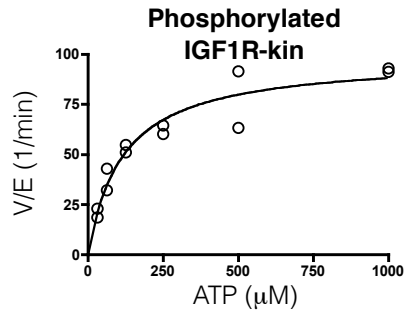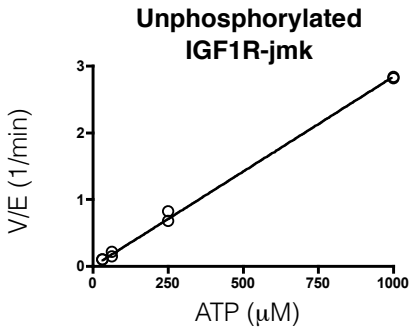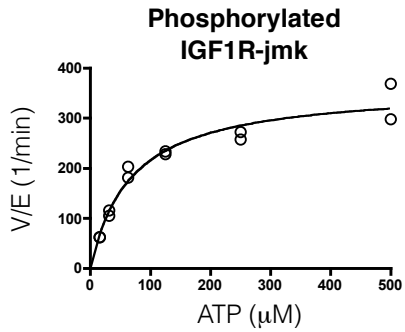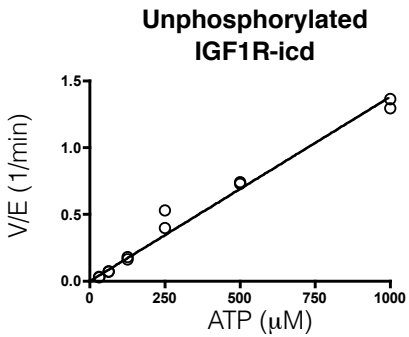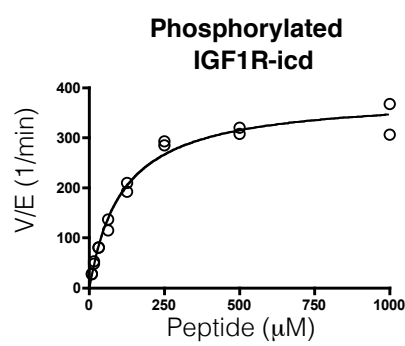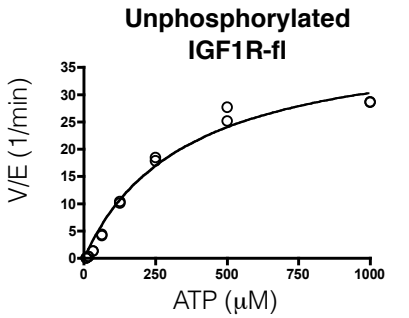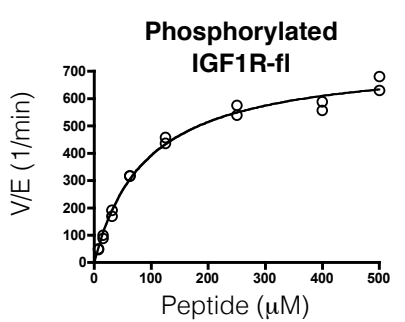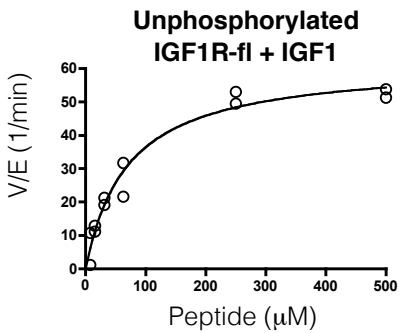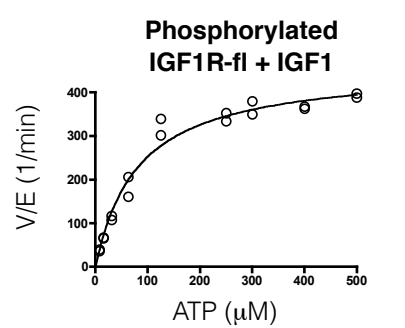

Supplement: supp [file elife_poa_e03772_Table_1_Source_Data_File_1.pdf › elife_poa_e03772_Table_1_Source_Data_File_1.pdf]
