# Supplementary figures and images for: How IGF-1 activates its receptor
Source: eLife journal article supplement (doi:10.7554/elife.03772), 2014-09-25

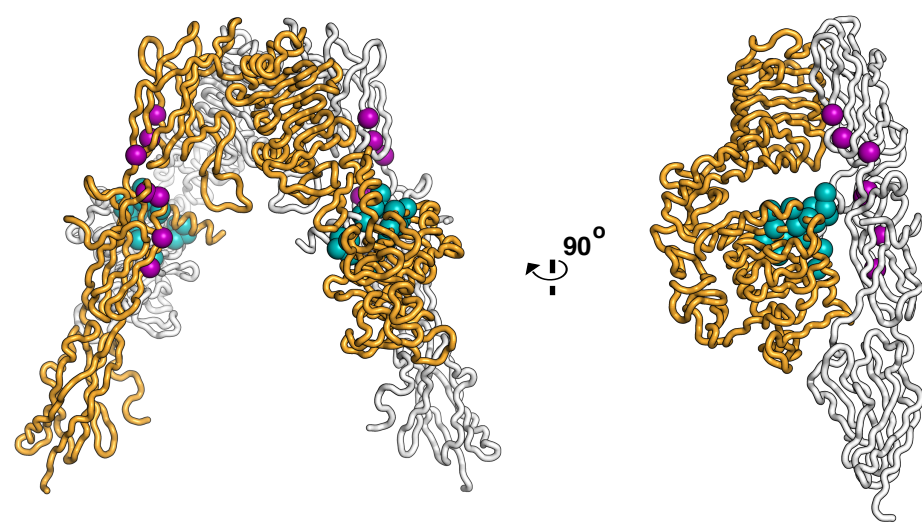

Supplement: supp [file elife_poa_e03772_Figure_1_supplemental_figure_1.pdf › elife_poa_e03772_Figure_1_supplemental_figure_1.pdf]

**INACTIVE**

**ACTIVE**

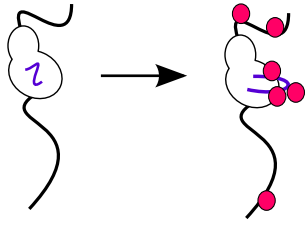

● PHOSPHORYLATION SITE

1 ACTIVATION LOOP

Supplement: supp [file elife_poa_e03772_Figure_1_supplemental_figure_2.pdf › elife_poa_e03772_Figure_1_supplemental_figure_2.pdf]

A

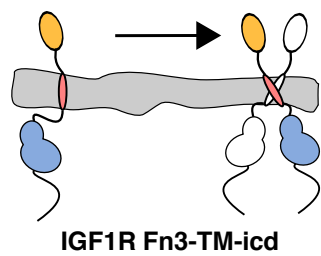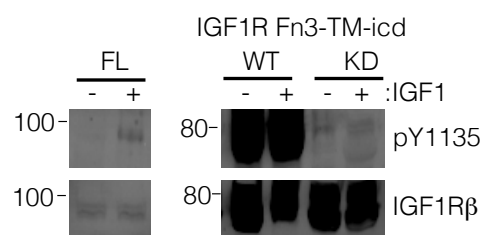

B

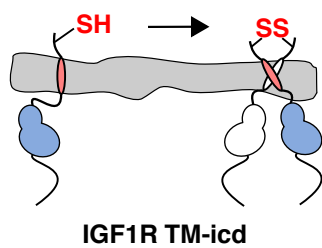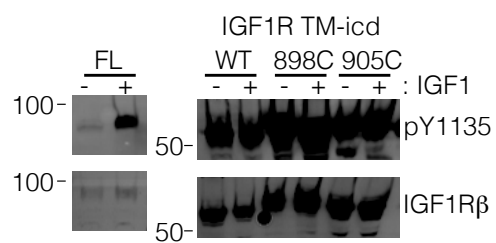

Supplement: supp [file elife_poa_e03772_Figure_1_supplemental_figure_3.pdf › elife_poa_e03772_Figure_1_supplemental_figure_3.pdf]

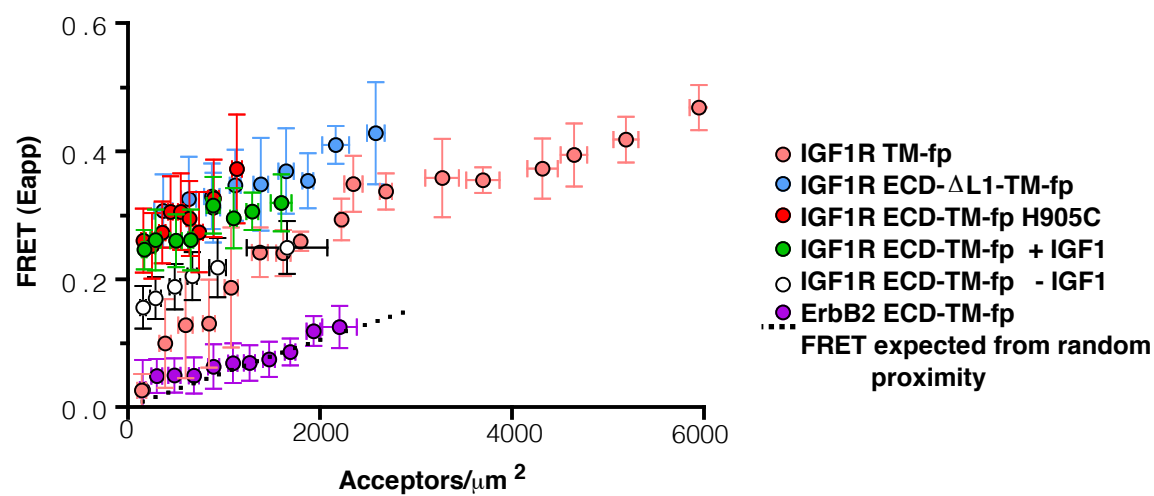

Supplement: supp [file elife_poa_e03772_Figure_4_supplemental_figure_1.pdf › elife_poa_e03772_Figure_4_supplemental_figure_1.pdf]

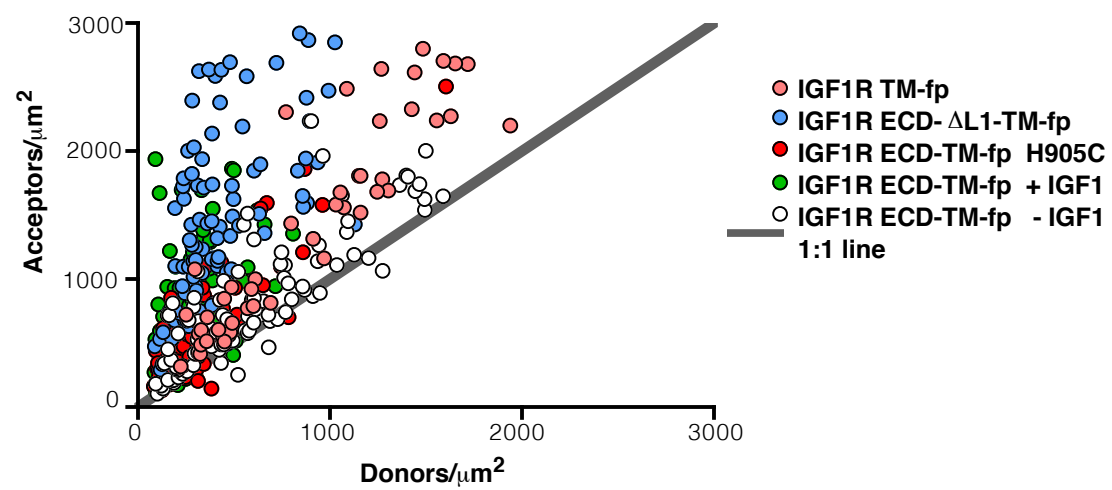

Supplement: supp [file elife_poa_e03772_Figure_4_supplemental_figure_2.pdf › elife_poa_e03772_Figure_4_supplemental_figure_2.pdf]

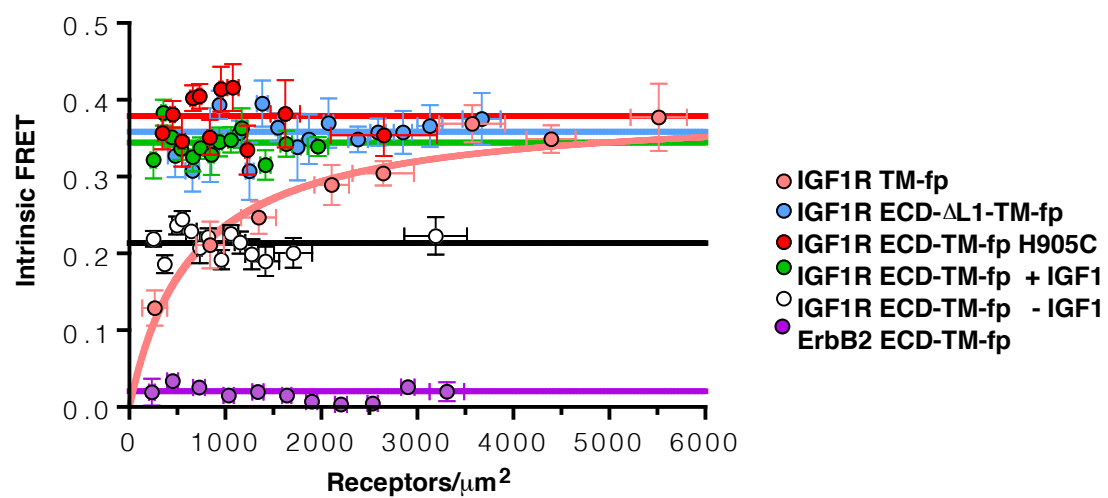

Supplement: supp [file elife_poa_e03772_Figure_4_supplemental_figure_3.pdf › elife_poa_e03772_Figure_4_supplemental_figure_3.pdf]

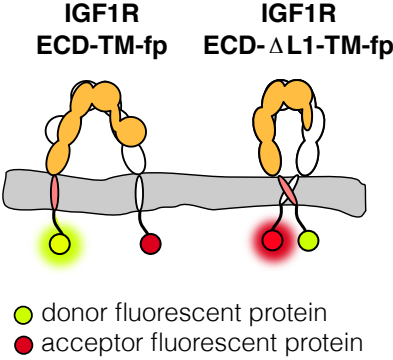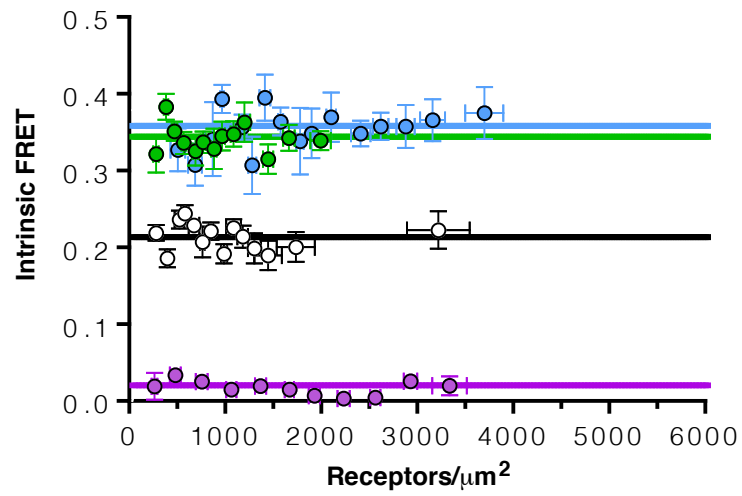

Supplement: supp [file elife_poa_e03772_Figure_4_supplemental_figure_4.pdf › elife_poa_e03772_Figure_4_supplemental_figure_4.pdf]

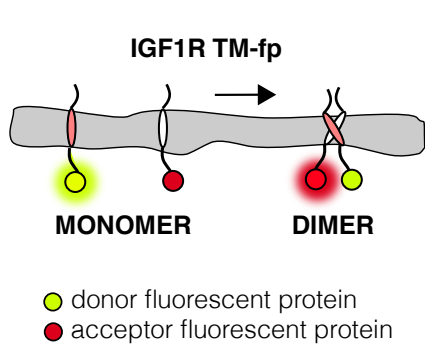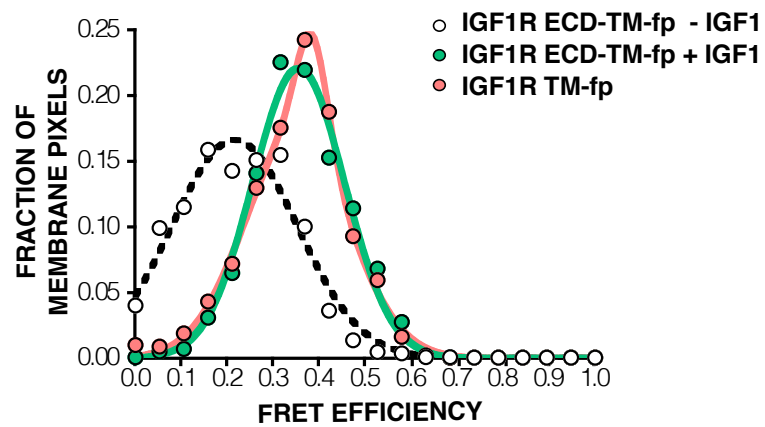

Supplement: supp [file elife_poa_e03772_Figure_4_supplemental_figure_5.pdf › elife_poa_e03772_Figure_4_supplemental_figure_5.pdf]

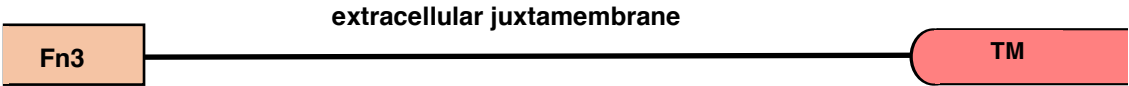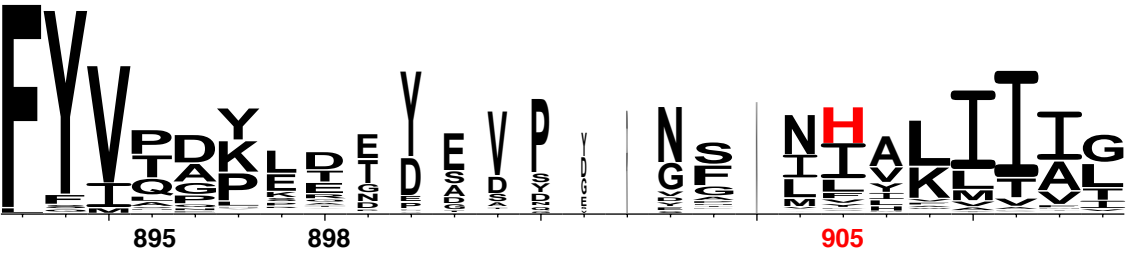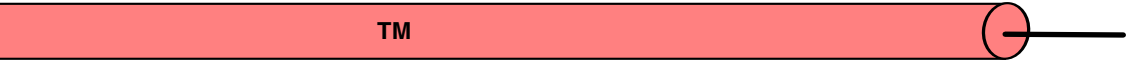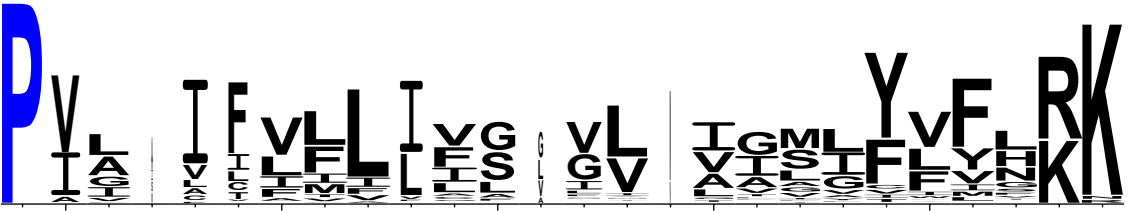

Supplement: supp [file elife_poa_e03772_Figure_5_supplemental_figure_1.pdf › elife_poa_e03772_Figure_5_supplemental_figure_1.pdf]

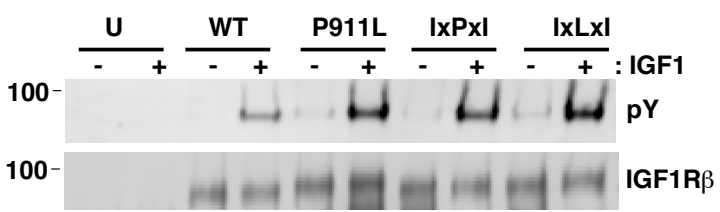

Supplement: supp [file elife_poa_e03772_Figure_5_supplemental_figure_2.pdf › elife_poa_e03772_Figure_5_supplemental_figure_2.pdf]

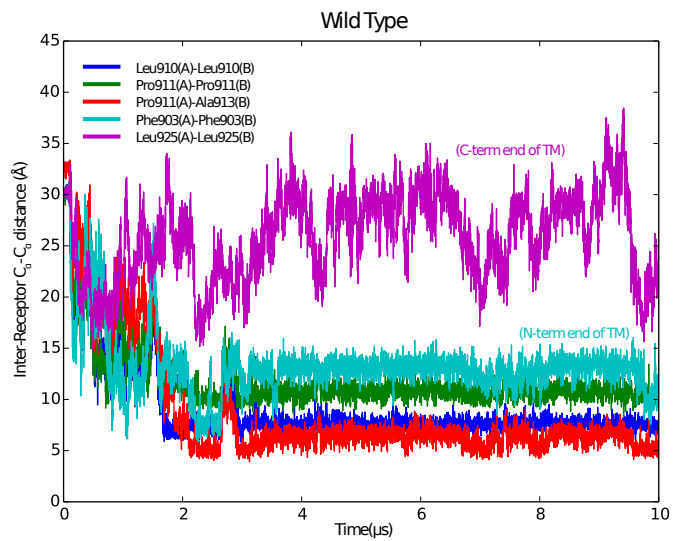

Supplement: supp [file elife_poa_e03772_Figure_5_supplemental_figure_3.pdf › elife_poa_e03772_Figure_5_supplemental_figure_3.pdf]

NON-REDUCING

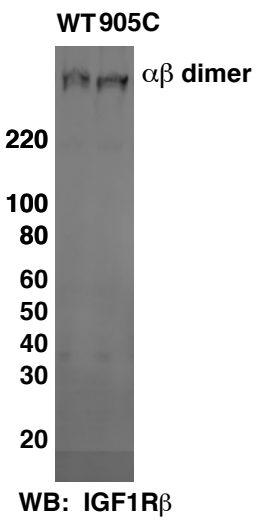

REDUCING

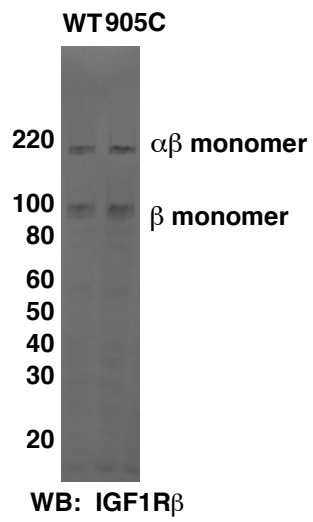

Supplement: supp [file elife_poa_e03772_Figure_6_supplemental_figure_1.pdf › elife_poa_e03772_Figure_6_supplemental_figure_1.pdf]

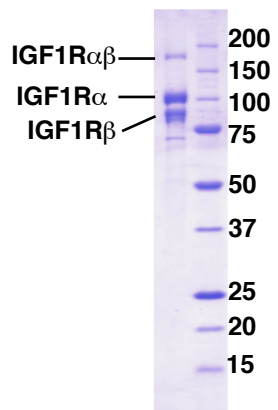

Supplement: supp [file elife_poa_e03772_Figure_7_supplemental_figure_1.pdf › elife_poa_e03772_Figure_7_supplemental_figure_1.pdf]

IGF1R-fl 0.6 1.0 1.6 2.8 4.9 : %IGF1 Bound  
if 1:1 Complex

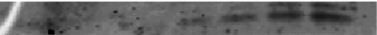

Supplement: supp [file elife_poa_e03772_Figure_7_supplemental_figure_2.pdf › elife_poa_e03772_Figure_7_supplemental_figure_2.pdf]

| IGF1R-kin |   | IGF1R-jmk |   | IGF1R-icd |   | : Phosphorylation |
|-----------|---|-----------|---|-----------|---|-------------------|
| -         | + | -         | + | -         | + |                   |

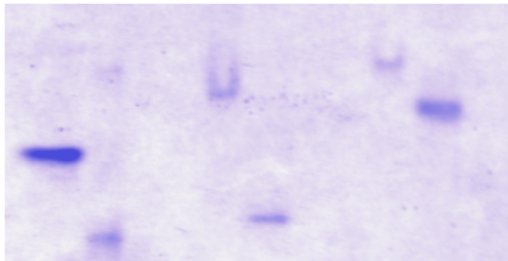

Supplement: supp [file elife_poa_e03772_Figure_7_supplemental_figure_3.pdf › elife_poa_e03772_Figure_7_supplemental_figure_3.pdf]

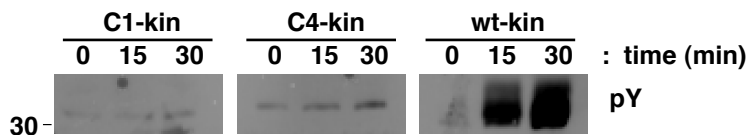

Supplement: supp [file elife_poa_e03772_Figure_8_supplemental_figure_3.pdf › elife_poa_e03772_Figure_8_supplemental_figure_3.pdf]

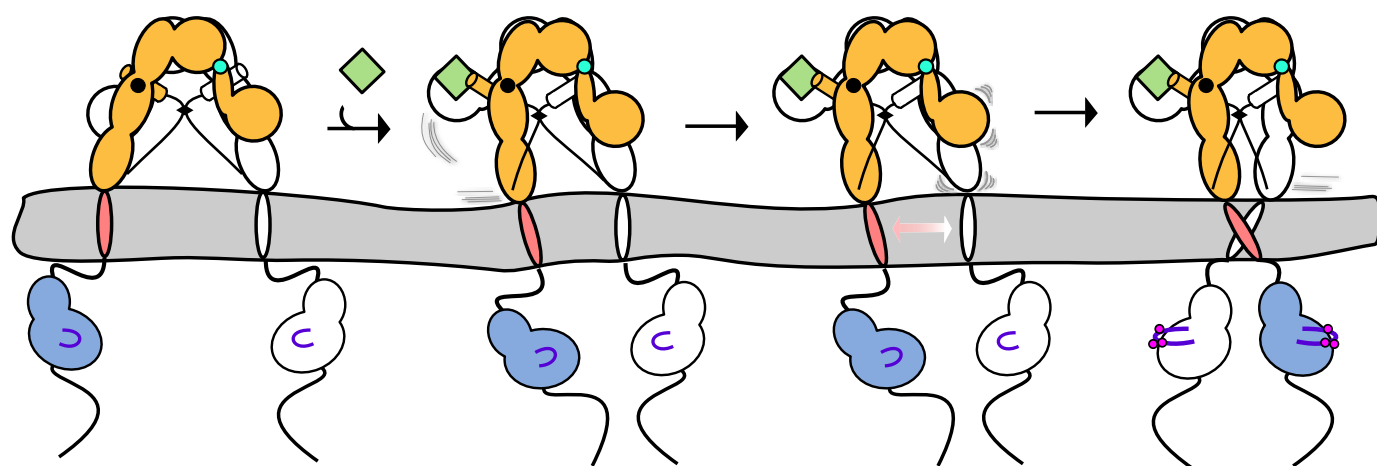

Supplement: supp [file elife_poa_e03772_Figure_9_supplemental_figure_1.pdf › elife_poa_e03772_Figure_9_supplemental_figure_1.pdf]
